# Supplementary material for: Host contributes to longitudinal diversity of fecal microbiota in swine selected for lean growth
Source: PubMed Central journal article supplement (PMC5755158; doi:10.1186/s40168-017-0384-1), 2018-01-04
Supplement: 40168_2017_384_MOESM5_ESM.pdf [file 40168_2017_384_MOESM5_ESM.pdf]

Table S12. P-values from Kruskal-Wallis tests for differences in abundance between pairs of time points at the genus level.

| <b>Genus</b>       | <b>Weaning vs Wk15</b> | <b>Weaning vs Off-test</b> | <b>Wk15 vs Off-test</b> |
|--------------------|------------------------|----------------------------|-------------------------|
| Acidaminococcus    | 1.08E-38               | 5.48E-67                   | 1.08E-180               |
| Acinetobacter      | 8.57E-01               | 3.34E-27                   | 1.18E-28                |
| Actinobacillus     | 0.00E+00               | 1.29E-254                  | 1.38E-24                |
| Actinomyces        | 3.25E-179              | 7.14E-87                   | 1.21E-35                |
| Adlercreutzia      | 2.01E-27               | 1.26E-91                   | 3.93E-36                |
| Aerococcus         | 5.25E-108              | 2.68E-202                  | 1.43E-28                |
| Akkermansia        | 7.70E-23               | 1.74E-22                   | NaN                     |
| Alistipes          | 2.51E-298              | 1.10E-216                  | 7.08E-57                |
| Allisonella        | 1.13E-27               | 7.15E-37                   | 9.22E-151               |
| Alloprevotella     | 2.10E-03               | 5.55E-14                   | 2.29E-14                |
| Anaerobiospirillum | 4.32E-47               | 1.65E-91                   | 5.23E-19                |
| Anaerococcus       | 5.99E-10               | 9.30E-42                   | 9.41E-98                |
| Anaerofustis       | 8.05E-01               | 8.86E-02                   | 1.37E-01                |
| Anaeroplasma       | 6.15E-90               | 2.67E-238                  | 2.80E-79                |
| Anaerostipes       | 6.51E-164              | 1.51E-295                  | 7.98E-54                |
| Anaerotruncus      | 7.29E-129              | 2.02E-128                  | 1.61E-01                |
| Anaerovibrio       | 5.98E-268              | 5.60E-228                  | 2.11E-24                |
| Atopobium          | 2.02E-50               | 1.92E-22                   | 3.42E-11                |
| Bacillus_1386      | 6.74E-03               | 5.97E-05                   | 9.52E-12                |
| Bacteroides        | 0.00E+00               | 0.00E+00                   | 1.69E-139               |
| Barnesiella        | 1.88E-52               | 1.82E-287                  | 2.22E-180               |
| Bifidobacterium    | 6.52E-181              | 4.52E-126                  | 1.30E-16                |
| Bilophila          | 0.00E+00               | 0.00E+00                   | 2.07E-02                |
| Blautia            | 3.85E-221              | 1.59E-184                  | 3.64E-42                |
| Butyricimonas      | 0.00E+00               | 0.00E+00                   | 1.02E-02                |
| Butyrivibrio       | 2.81E-203              | 3.86E-83                   | 1.13E-52                |
| Campylobacter      | 6.65E-117              | 4.99E-27                   | 1.75E-77                |
| Catenibacterium    | 5.22E-44               | 7.10E-22                   | 1.80E-104               |
| Cellulosilyticum   | 5.76E-06               | 5.68E-74                   | 1.12E-91                |
| Chlamydia          | 1.50E-11               | 1.14E-01                   | 4.79E-20                |
| Christensenella    | 3.62E-117              | 2.17E-117                  | 4.21E-01                |
| Clostridium        | 4.30E-171              | 1.07E-253                  | 5.88E-28                |
| Collinsella        | 1.80E-42               | 9.20E-151                  | 8.77E-78                |
| Comamonas          | 3.09E-11               | 1.21E-05                   | 5.13E-03                |
| Coprococcus        | 0.00E+00               | 0.00E+00                   | 1.15E-135               |
| Corynebacterium    | 7.46E-02               | 3.91E-11                   | 1.59E-06                |
| Desulfovibrio      | 8.73E-291              | 2.38E-297                  | 9.52E-01                |
| Dialister          | 2.27E-229              | 3.18E-40                   | 0.00E+00                |
| Dorea              | 1.81E-20               | 2.97E-46                   | 1.65E-21                |

|                       |           |           |           |
|-----------------------|-----------|-----------|-----------|
| Elusimicrobium        | 2.07E-10  | 5.48E-15  | 2.20E-02  |
| Enterococcus          | 2.39E-267 | 1.95E-175 | 1.30E-21  |
| Escherichia           | 0.00E+00  | 0.00E+00  | 3.31E-39  |
| Eubacterium           | 1.68E-02  | 2.76E-21  | 3.29E-86  |
| Facklamia             | 2.59E-07  | 3.17E-104 | 1.53E-80  |
| Faecalibacterium      | 6.57E-198 | 1.25E-26  | 1.15E-218 |
| Fibrobacter           | 5.88E-277 | 1.71E-269 | 1.60E-08  |
| Finegoldia            | 3.12E-28  | 3.92E-13  | 3.56E-05  |
| Flavonifractor        | 5.84E-35  | 2.44E-126 | 6.28E-45  |
| Fusobacterium         | 0.00E+00  | 9.19E-276 | 2.00E-29  |
| Gallicola             | 5.81E-03  | 7.38E-28  | 1.37E-39  |
| Helcococcus           | 8.79E-49  | 3.34E-23  | 2.35E-11  |
| Helicobacter          | 2.66E-114 | 3.10E-160 | 4.96E-24  |
| Howardella            | 2.00E-234 | 5.54E-274 | 3.44E-13  |
| Jeotgalicoccus        | 1.03E-13  | 3.00E-57  | 3.10E-25  |
| Kurthia               | 9.22E-96  | 6.48E-64  | 1.60E-06  |
| Lachnospira           | 0.00E+00  | 0.00E+00  | 4.22E-46  |
| Lactobacillus         | 3.49E-153 | 1.49E-09  | 2.19E-125 |
| Megasphaera           | 3.72E-200 | 3.83E-153 | 0.00E+00  |
| Mitsuokella           | 0.00E+00  | 1.10E-261 | 3.87E-131 |
| Mobiluncus            | 1.30E-253 | 0.00E+00  | 2.62E-92  |
| Mogibacterium         | 7.05E-12  | 9.19E-55  | 3.16E-67  |
| Moraxella_475         | 2.45E-61  | 6.43E-22  | 2.48E-15  |
| Mucispirillum         | 3.85E-01  | 7.39E-25  | 1.29E-27  |
| Nosocomiicoccus       | 9.07E-01  | 1.20E-120 | 4.40E-129 |
| Odoribacter           | 7.12E-231 | 5.01E-224 | 1.67E-01  |
| Olsenella             | 2.12E-01  | 2.67E-66  | 6.07E-98  |
| Oscillibacter         | 6.27E-06  | 1.74E-04  | 4.23E-04  |
| Oxalobacter           | 8.77E-05  | 3.91E-03  | 5.55E-01  |
| Parabacteroides       | 8.82E-227 | 1.49E-276 | 1.50E-13  |
| Parasutterella        | 6.40E-04  | 3.65E-02  | 4.69E-09  |
| Parvimonas            | 2.65E-22  | 5.18E-02  | 2.28E-30  |
| Pediococcus           | 8.33E-02  | 7.85E-03  | 3.30E-01  |
| Peptococcus           | 9.46E-05  | 2.43E-121 | 4.74E-215 |
| Peptoniphilus         | 1.66E-03  | 1.88E-72  | 5.00E-63  |
| Peptostreptococcus    | 1.60E-63  | 7.45E-70  | 3.54E-02  |
| Phascolarctobacterium | 4.05E-09  | 1.68E-15  | 3.57E-03  |
| Porphyromonas         | 1.09E-08  | 5.51E-204 | 1.77E-177 |
| Prevotella            | 1.36E-133 | 1.53E-06  | 7.71E-197 |
| Pseudoflavonifractor  | 1.86E-13  | 3.20E-23  | 1.43E-03  |
| Pyramidobacter        | 1.22E-87  | 3.52E-82  | 6.56E-02  |
| Roseburia             | 8.46E-43  | 1.14E-12  | 2.19E-37  |
| Rothia_32207          | 1.77E-195 | 3.99E-158 | 1.16E-06  |

|                                    |           |           |           |
|------------------------------------|-----------|-----------|-----------|
| Ruminobacter                       | 3.36E-07  | 4.22E-07  | NaN       |
| Ruminococcus                       | 1.99E-03  | 1.39E-06  | 1.91E-113 |
| Schwartzia_55506                   | 8.96E-83  | 4.82E-10  | 2.26E-62  |
| Selenomonas                        | 2.96E-207 | 7.98E-45  | 1.46E-112 |
| Sharpea                            | 1.24E-265 | 4.72E-250 | 1.71E-04  |
| Slackia                            | 1.87E-26  | 1.86E-10  | 7.14E-61  |
| Solobacterium                      | 1.42E-47  | 1.18E-17  | 1.55E-13  |
| Sporobacter                        | 9.77E-69  | 4.38E-65  | 6.75E-01  |
| Sporobacterium                     | 8.02E-19  | 8.57E-231 | 2.52E-193 |
| Staphylococcus                     | 8.63E-43  | 2.43E-20  | 5.31E-07  |
| Streptococcus                      | 1.52E-232 | 1.13E-238 | 1.58E-02  |
| Subdoligranulum                    | 1.42E-01  | 2.93E-46  | 2.30E-209 |
| Succinivibrio                      | 2.43E-298 | 3.41E-185 | 5.10E-177 |
| Sutterella                         | 3.13E-49  | 3.19E-101 | 3.75E-32  |
| Synergistes                        | 5.08E-230 | 1.01E-217 | 3.73E-03  |
| Treponema                          | 2.26E-11  | 3.25E-95  | 1.89E-136 |
| Trueperella                        | 3.43E-163 | 9.88E-152 | 3.70E-02  |
| Turicibacter                       | 0.00E+00  | 0.00E+00  | 0.00E+00  |
| Unclassified_erysipelotrichaceae   | 4.28E-81  | 7.94E-211 | 1.18E-99  |
| Unclassified_pasteurellaceae       | 0.00E+00  | 0.00E+00  | 6.36E-01  |
| Unclassified_peptostreptococcaceae | 0.00E+00  | 0.00E+00  | 5.63E-34  |
| Veillonella                        | 1.03E-165 | 1.38E-131 | 2.10E-09  |
| Victivallis                        | 3.37E-66  | 3.14E-45  | 2.59E-04  |
| Weissella                          | 2.23E-133 | 6.65E-20  | 4.92E-76  |

Wk15: week 15; vs: versus; NaN: no data.
